# Supplementary material for: Cross-Amplification in Strigiformes: A New STR Panel for Forensic Purposes
Source: MDPI journal article supplement (doi:10.3390/genes12111721), 2021-10-28

# Supplementary Material

**Figure S1. Allelic ladders**

The allelic ladder for each locus was drawn in Genemapper. Electropherograms up to three individuals were merged to describe all the alleles in the full marker size range.

a) 15A6

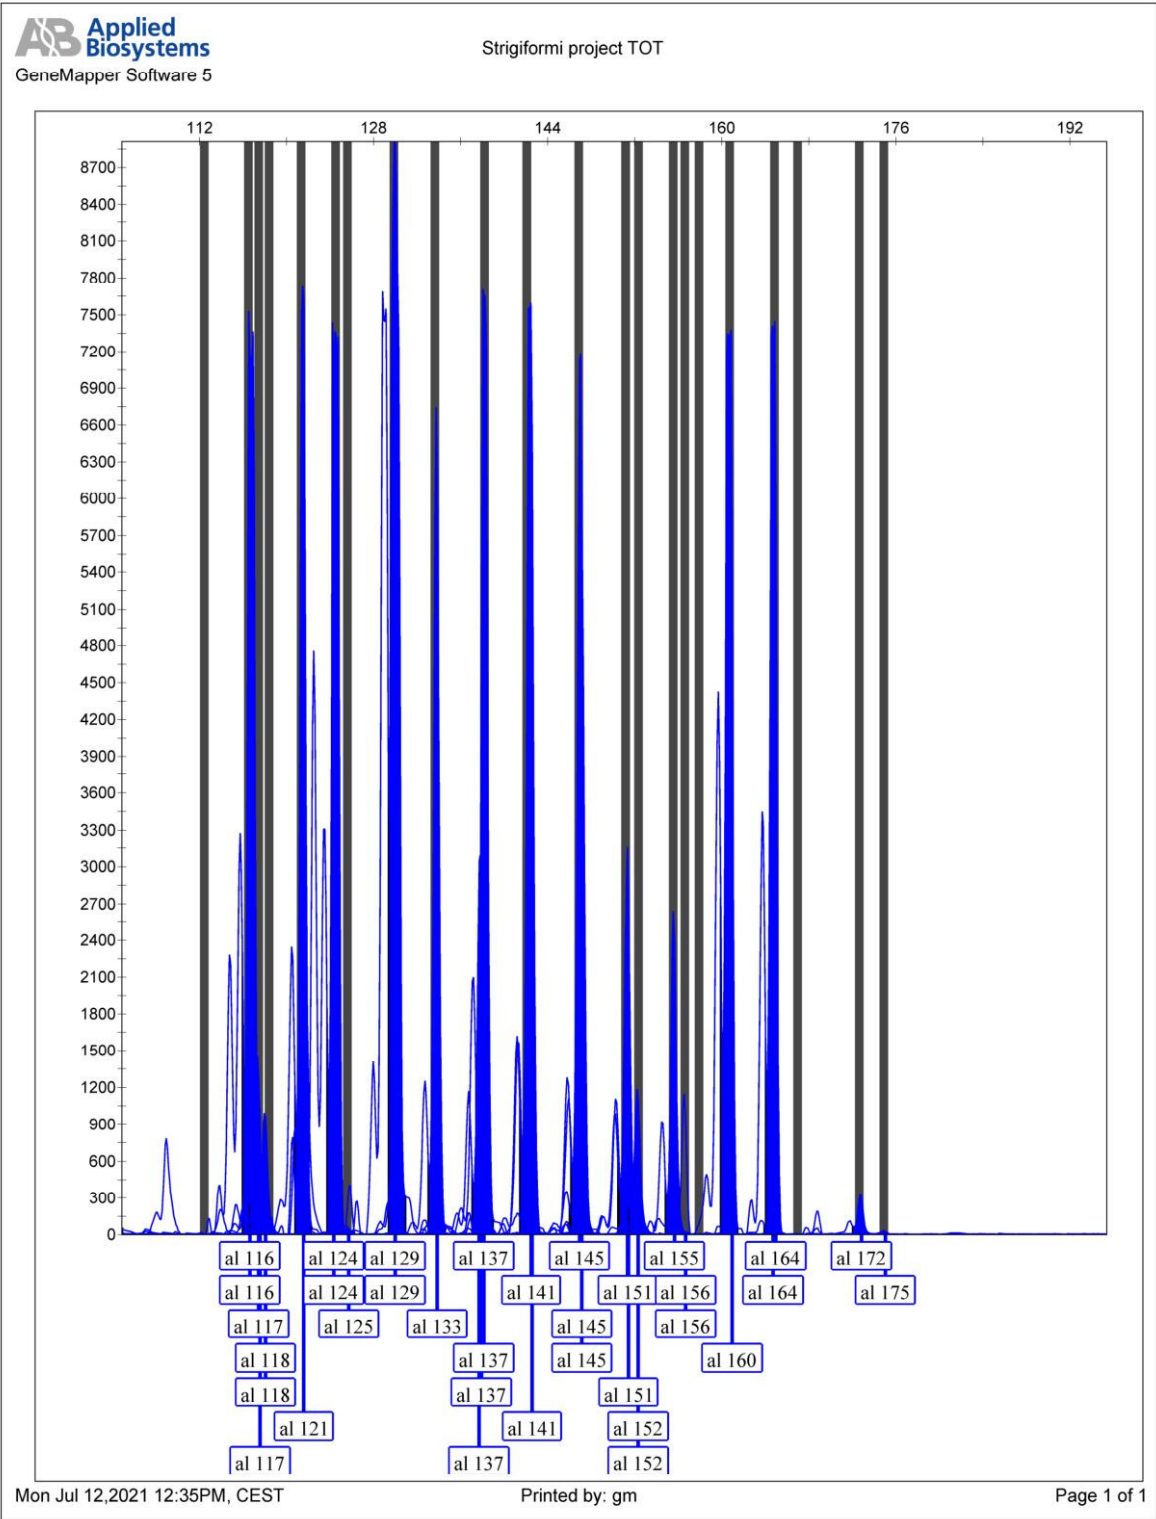

b) FePo42

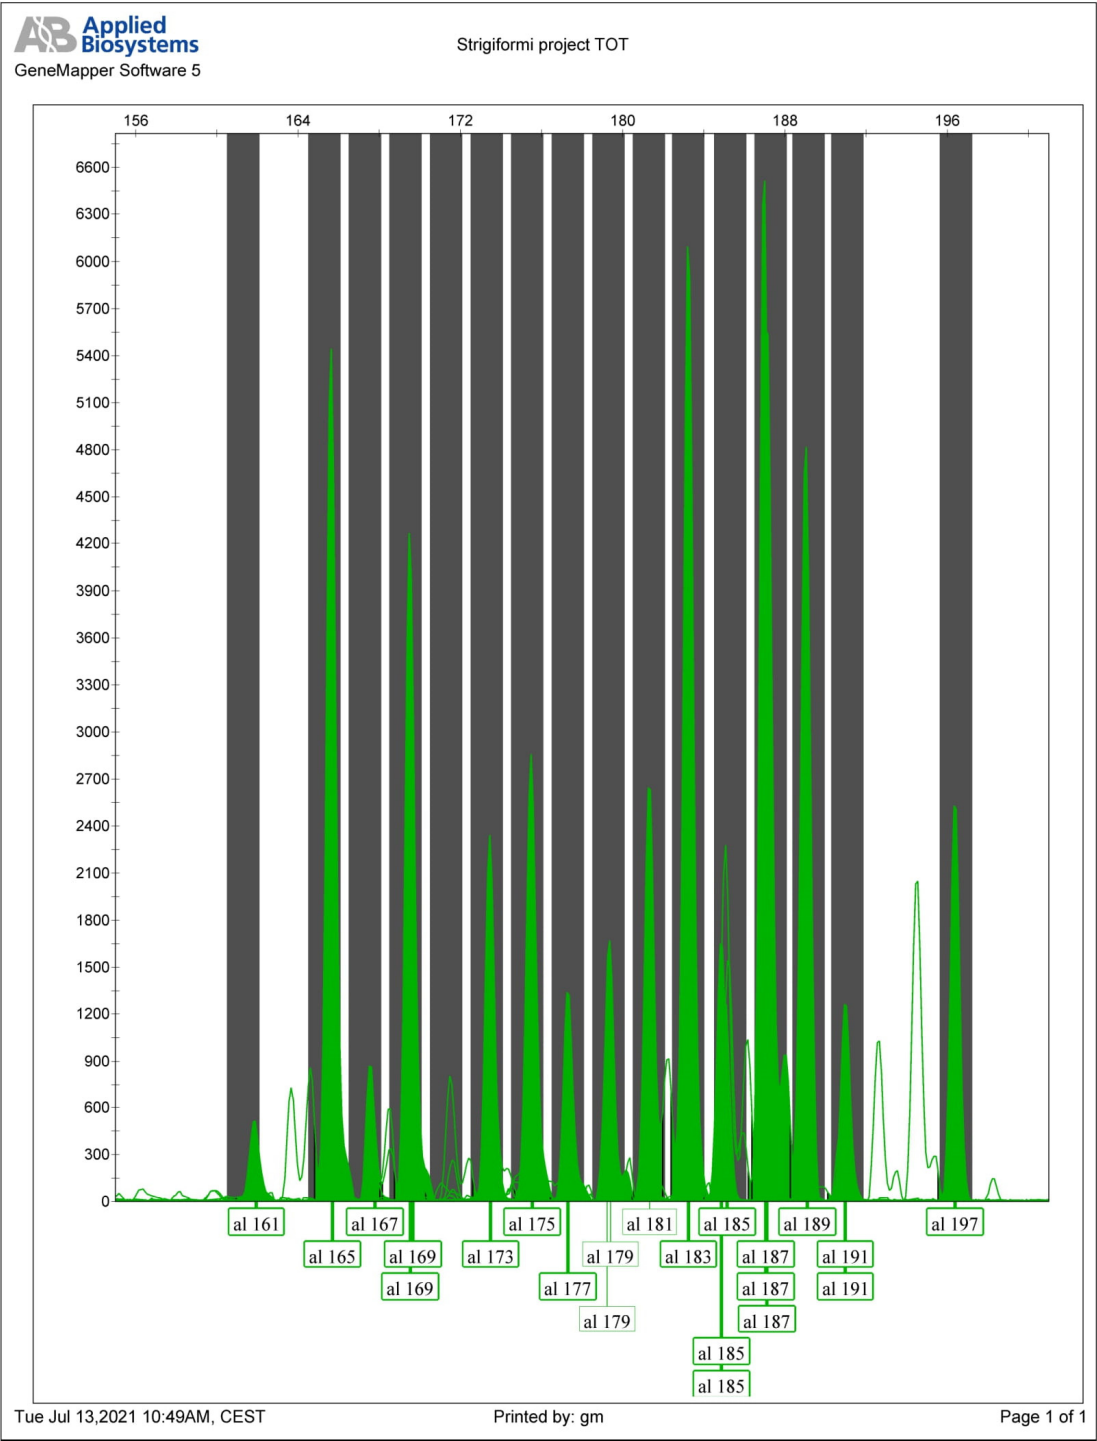

c) Oe53

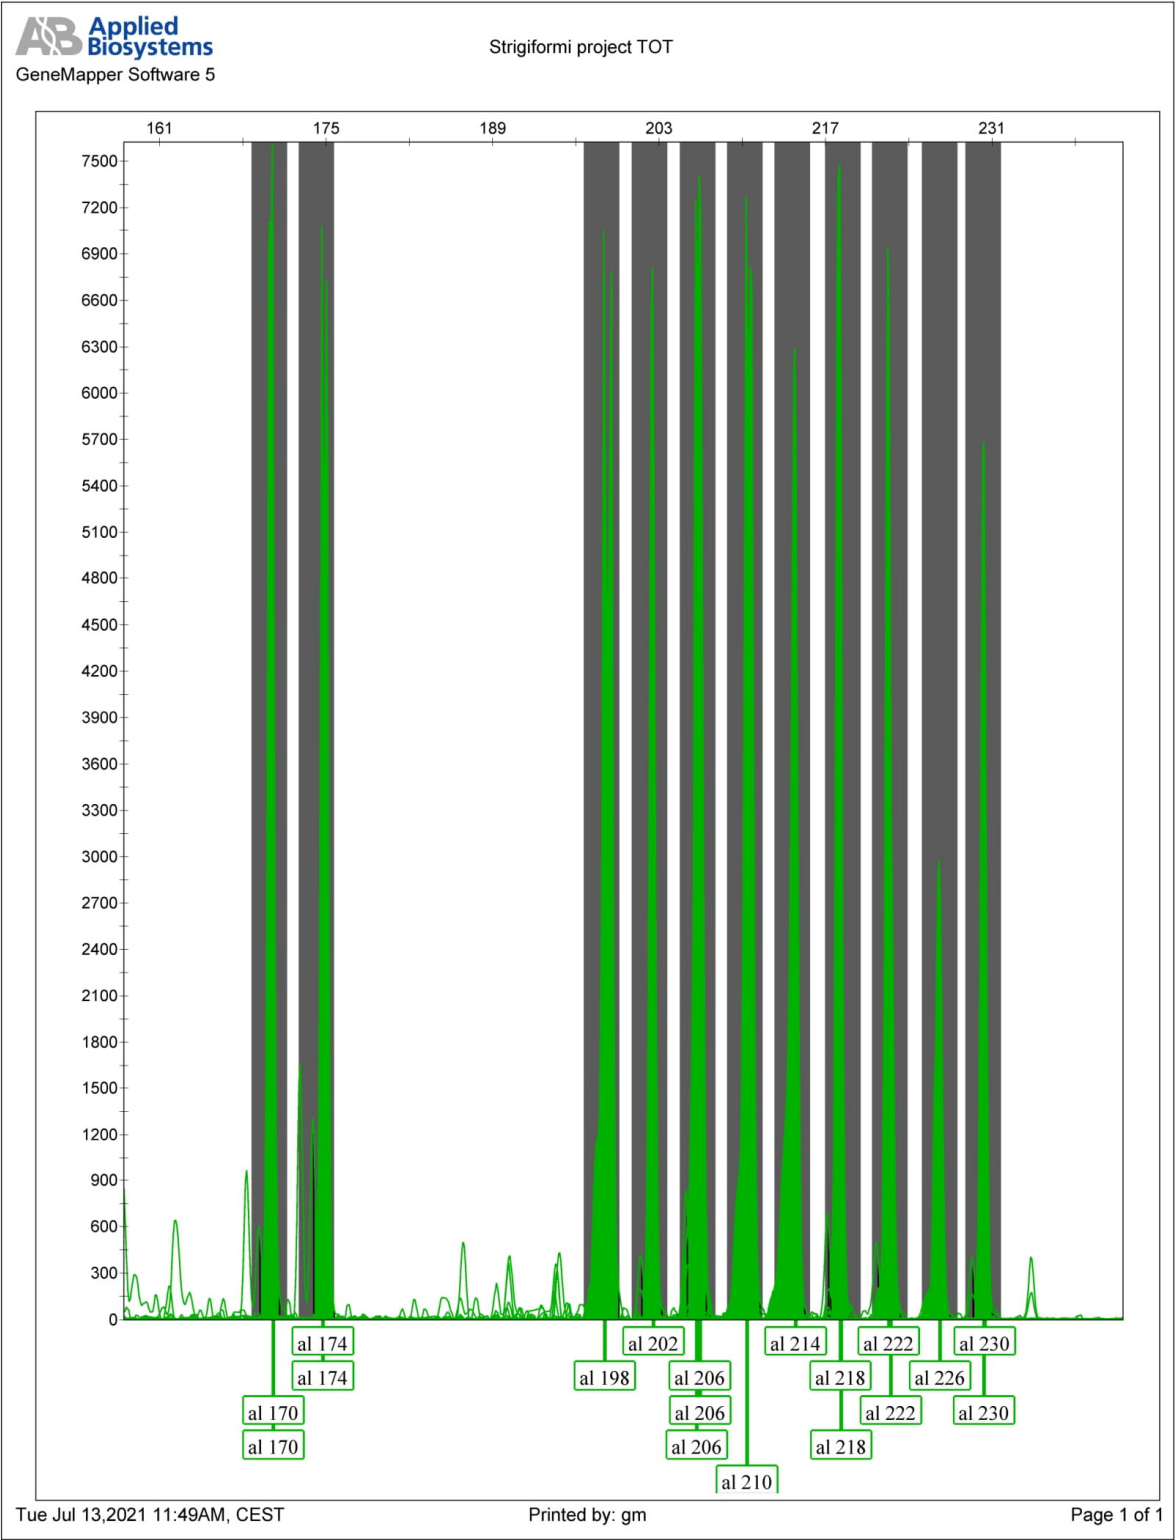

d) Oe54

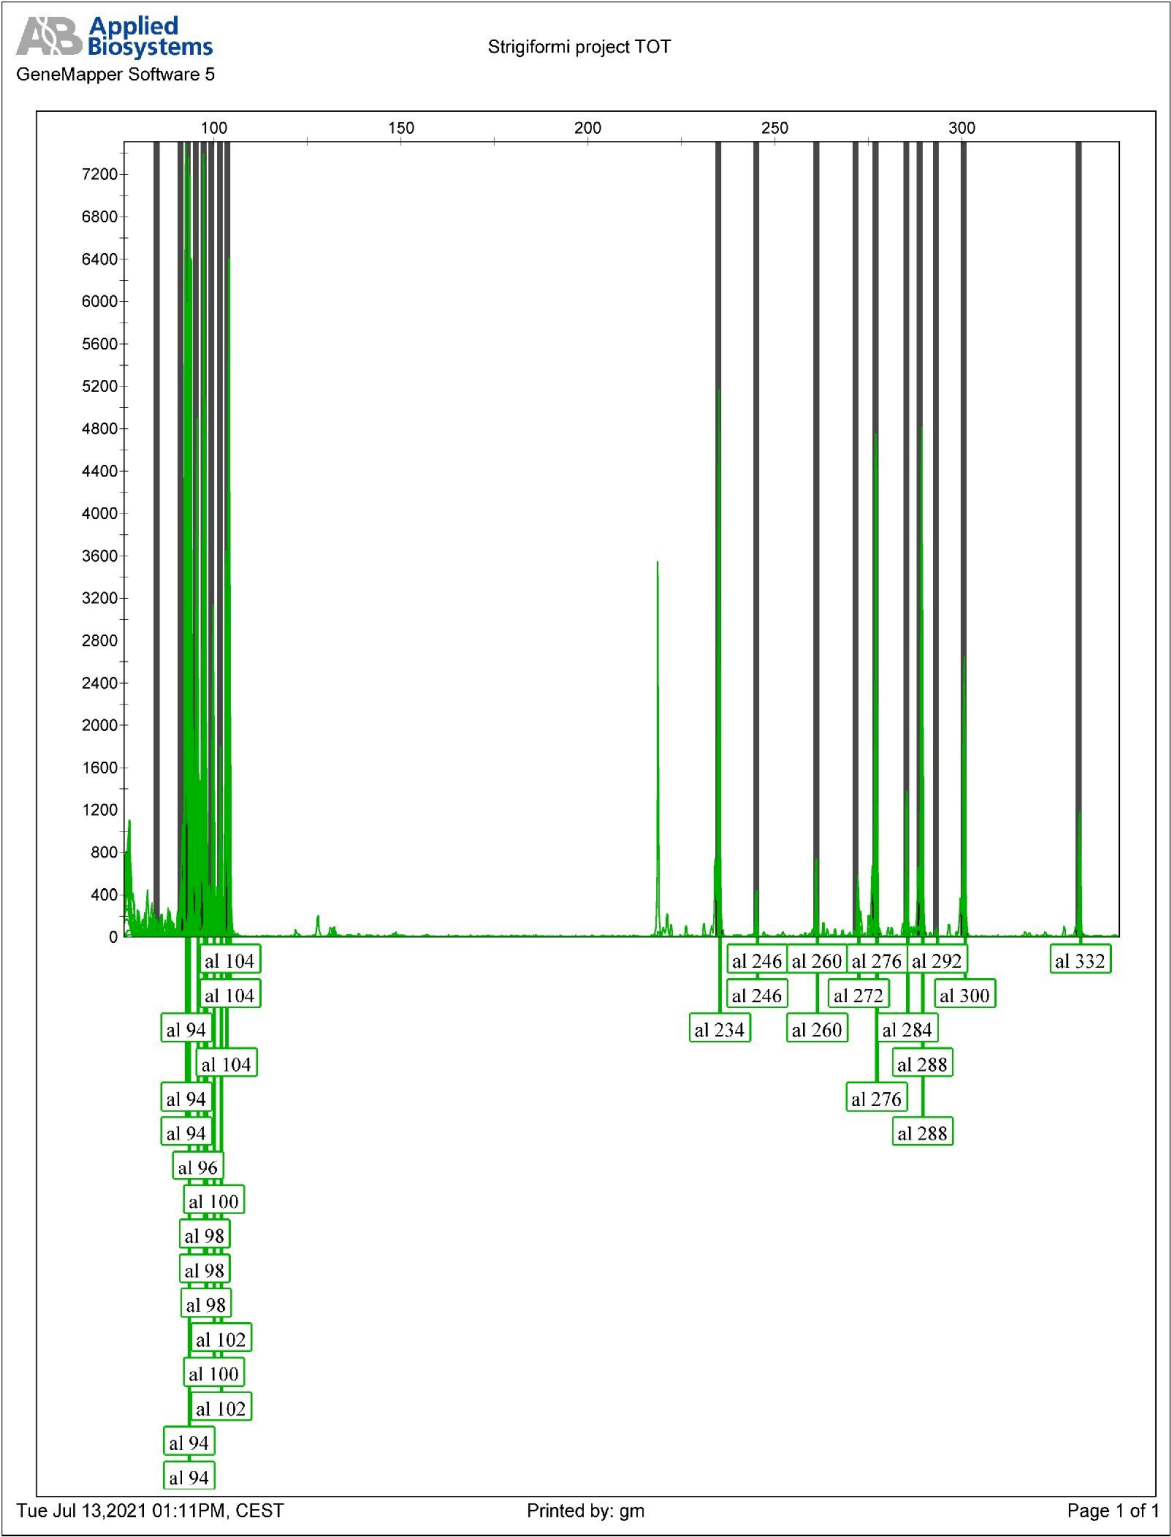

e) Oe128

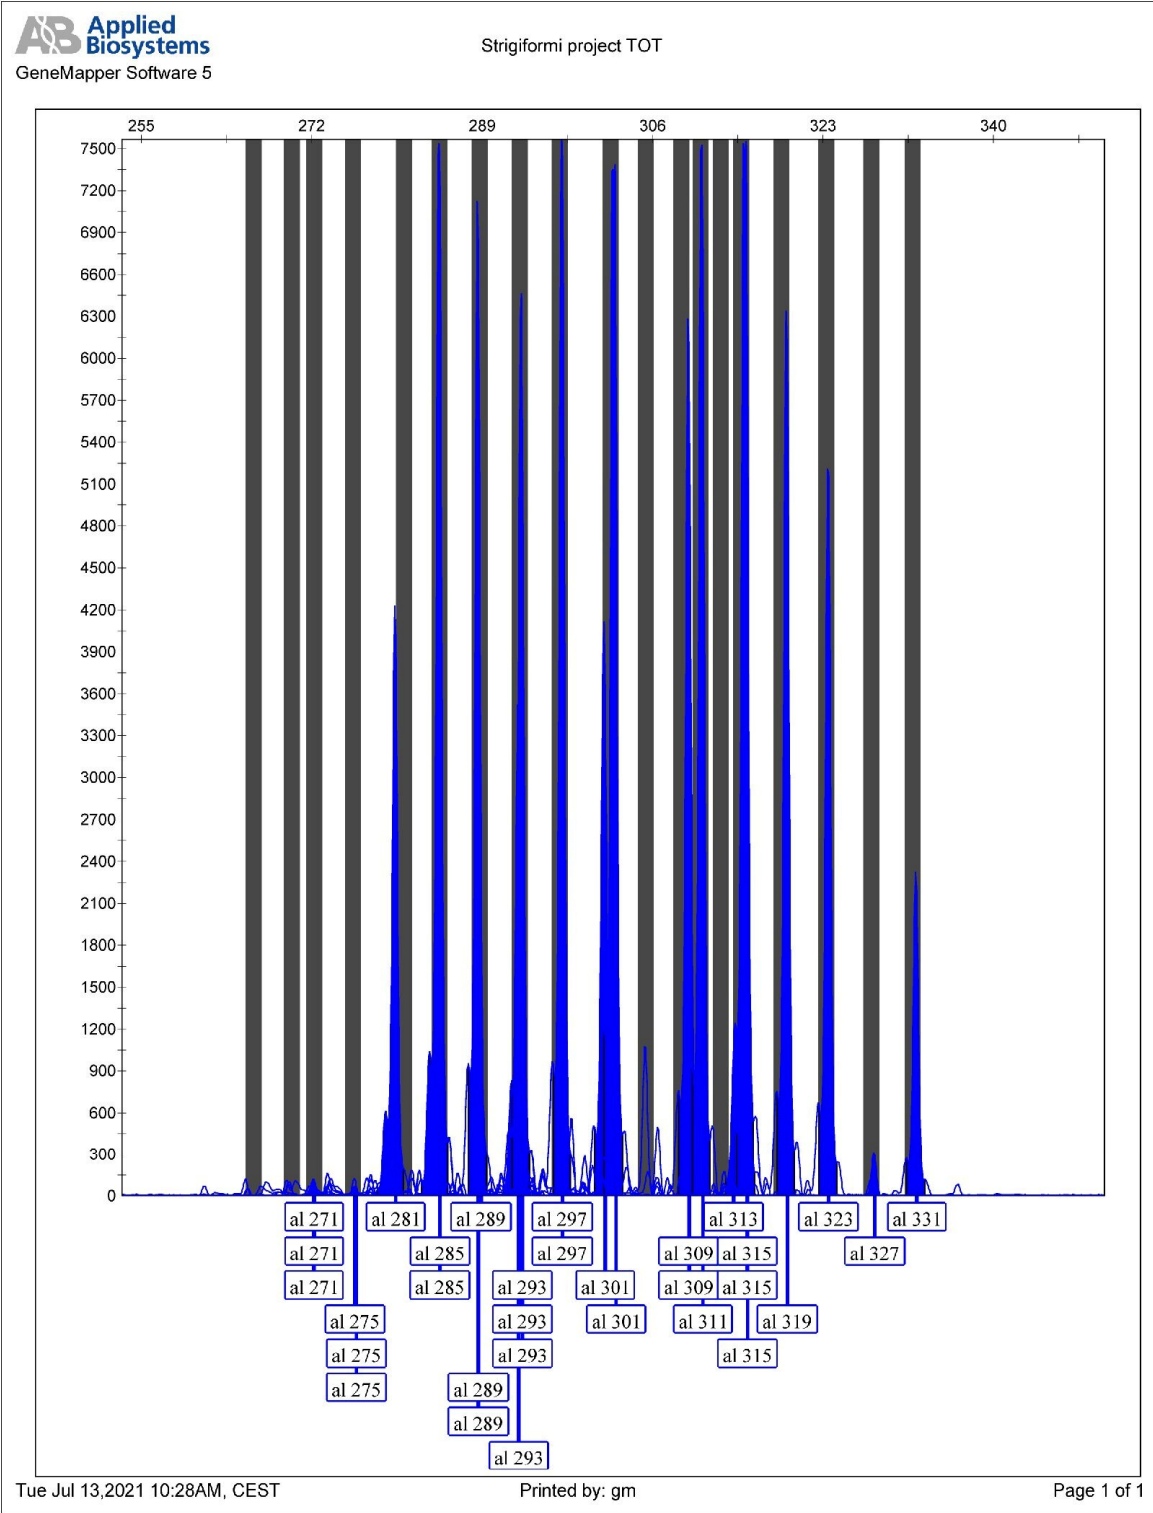

f) Oe129

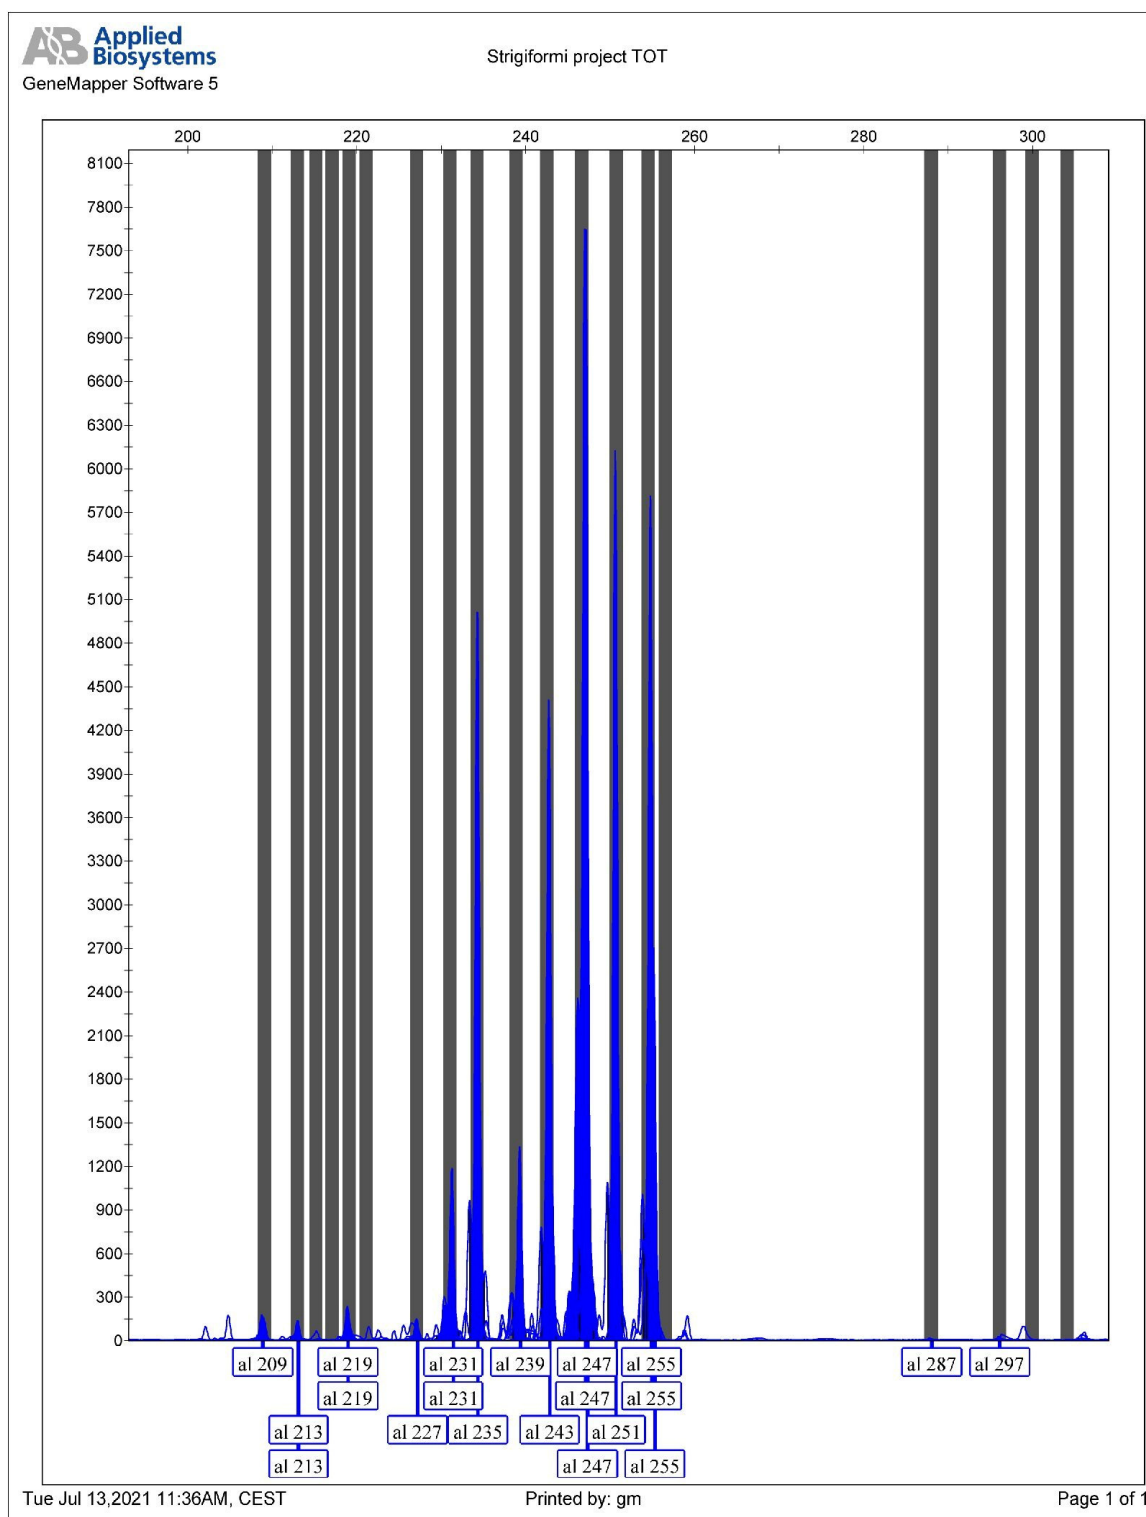

g) Oe142

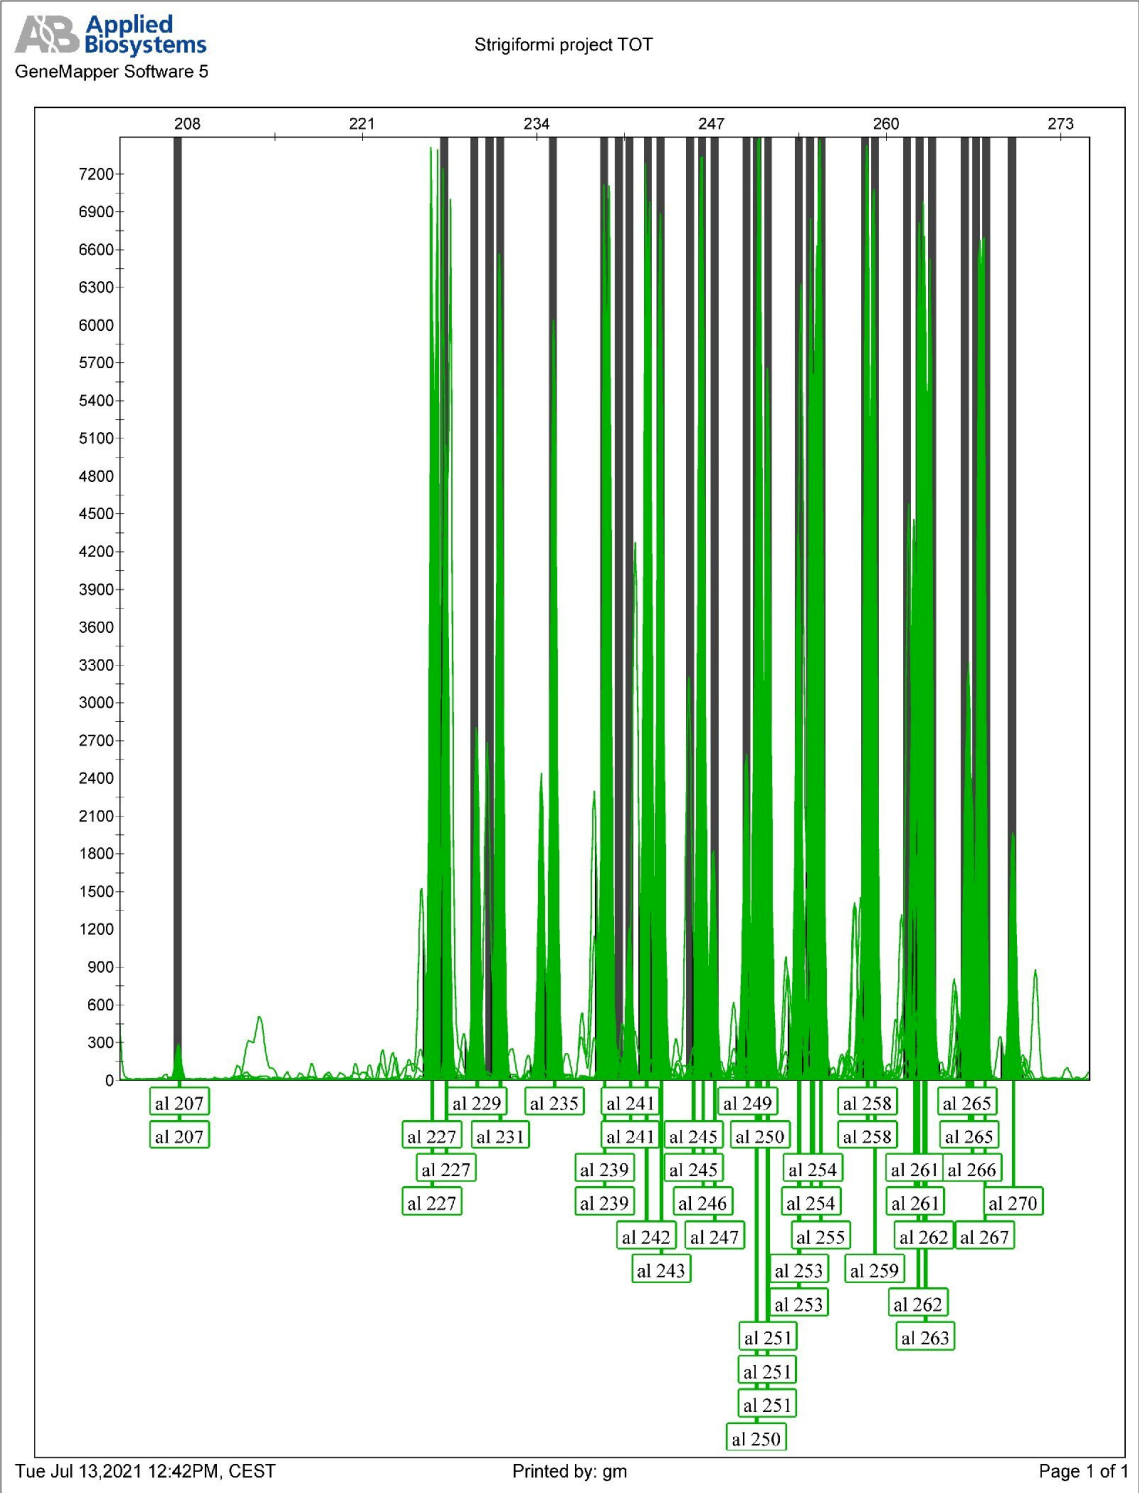

h) Oe149

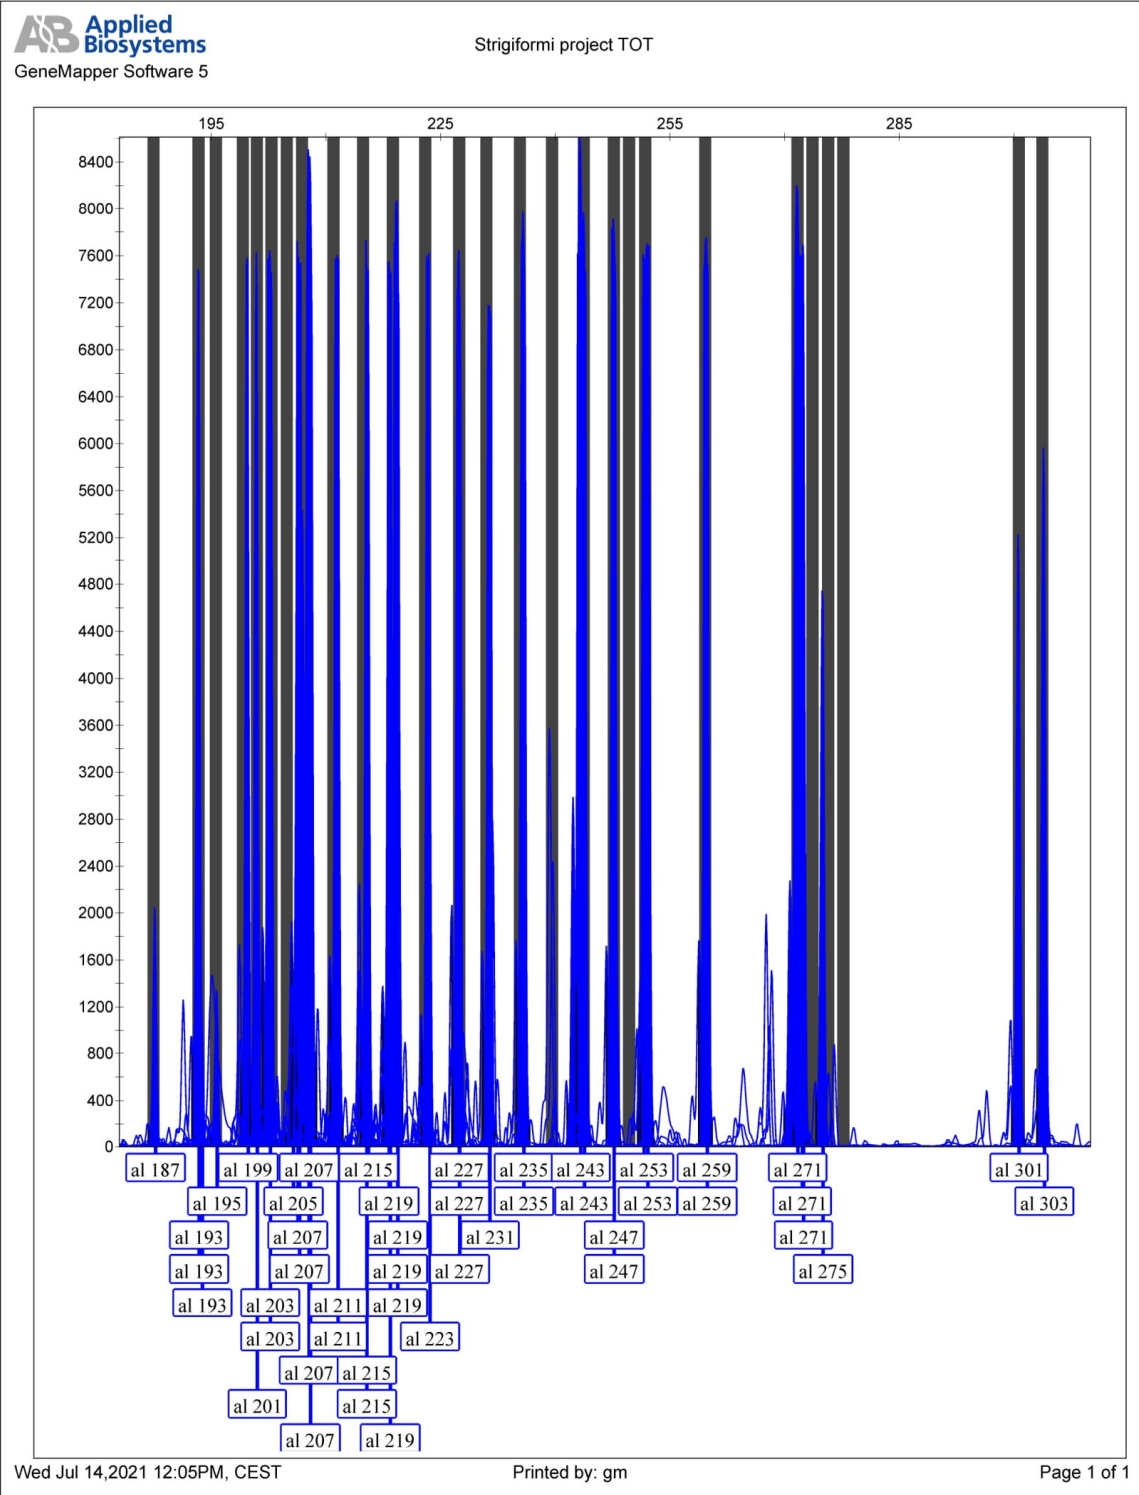



i) Oe321

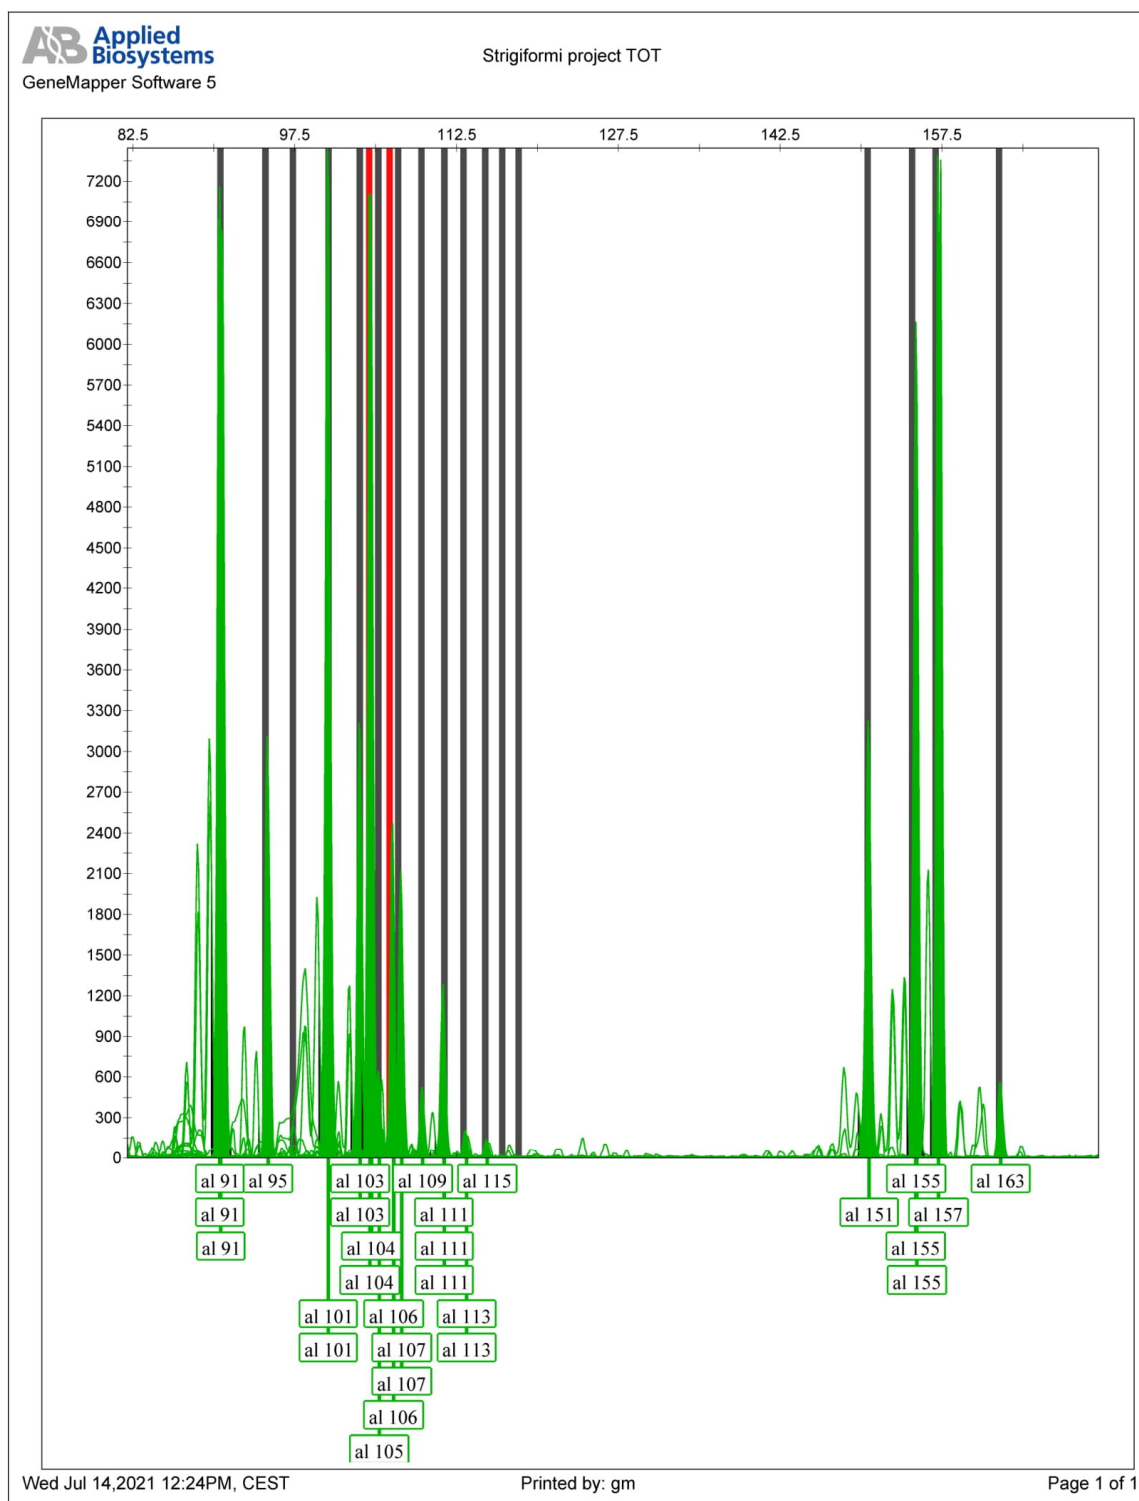

j) Sned113

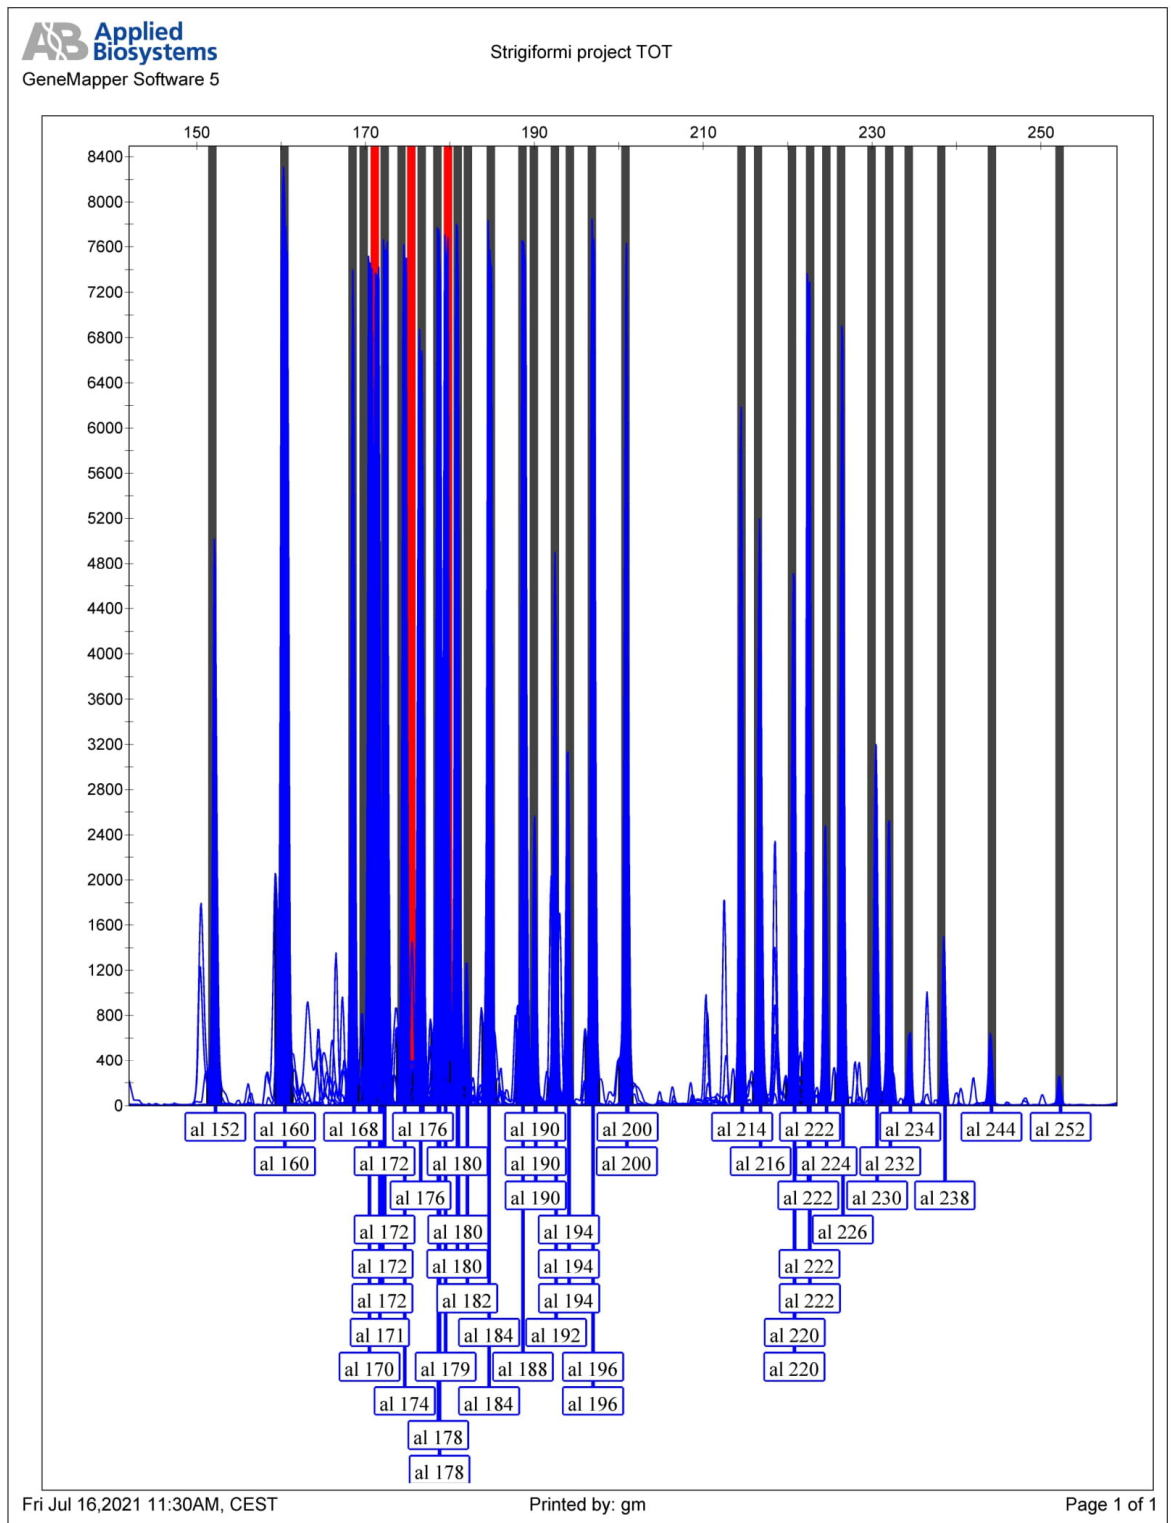

k) Sned218

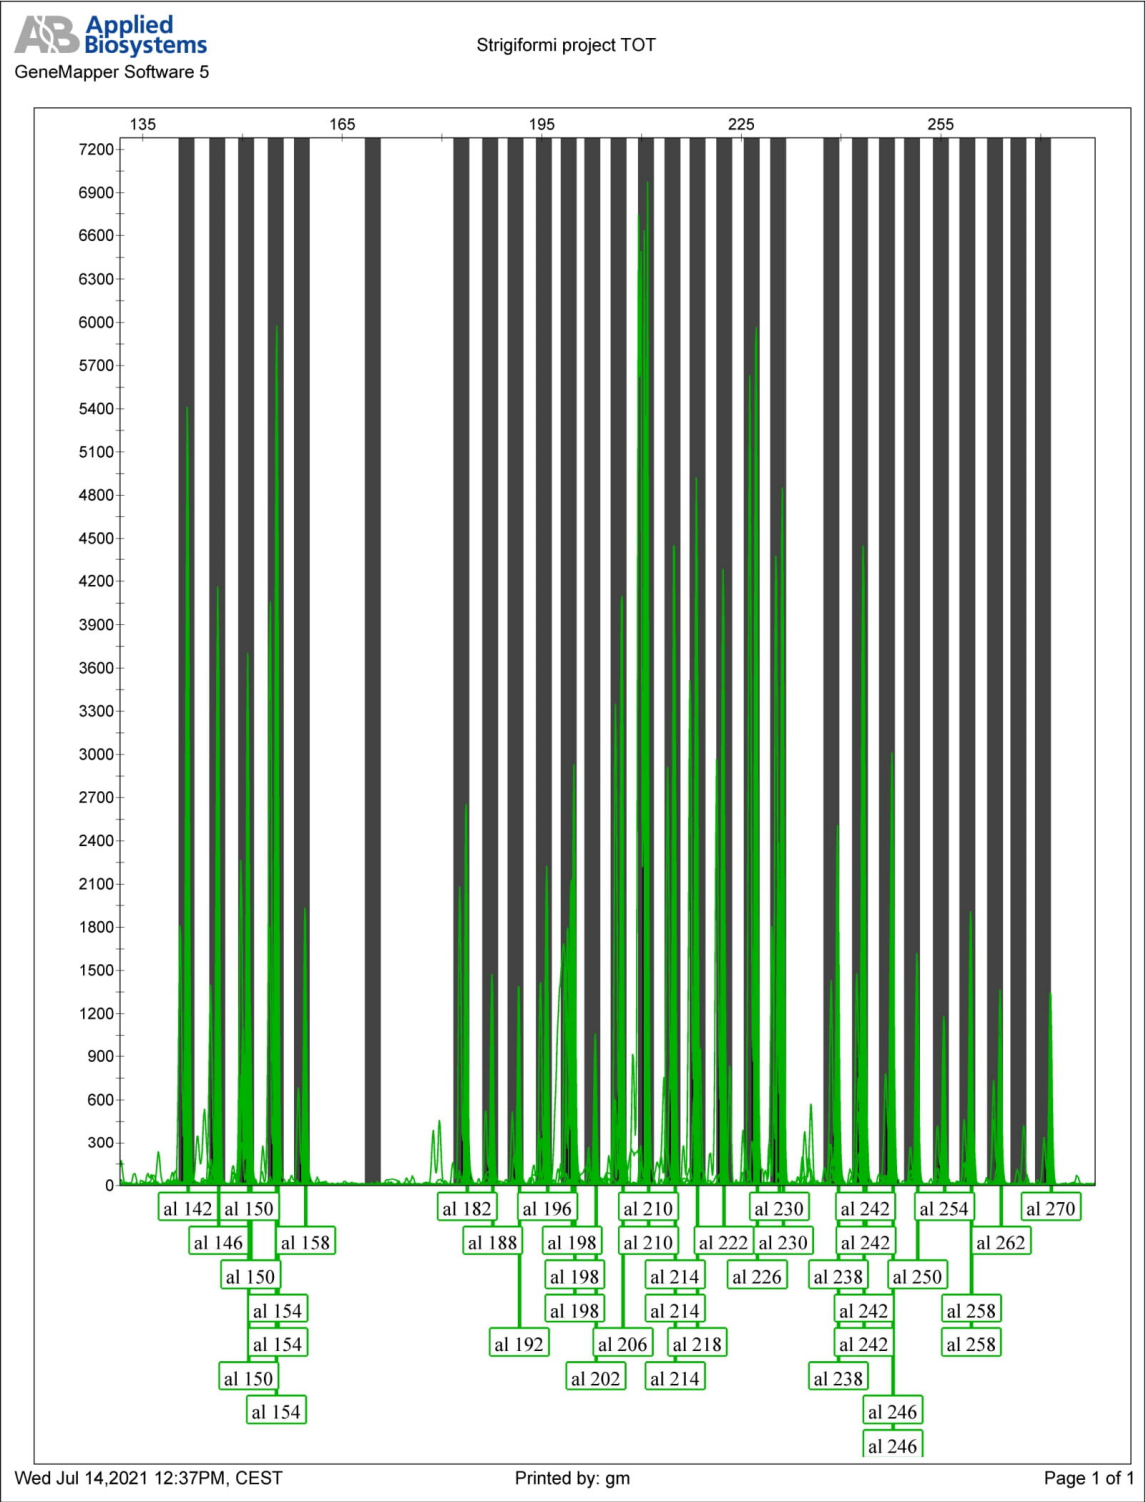

l) Tgu06

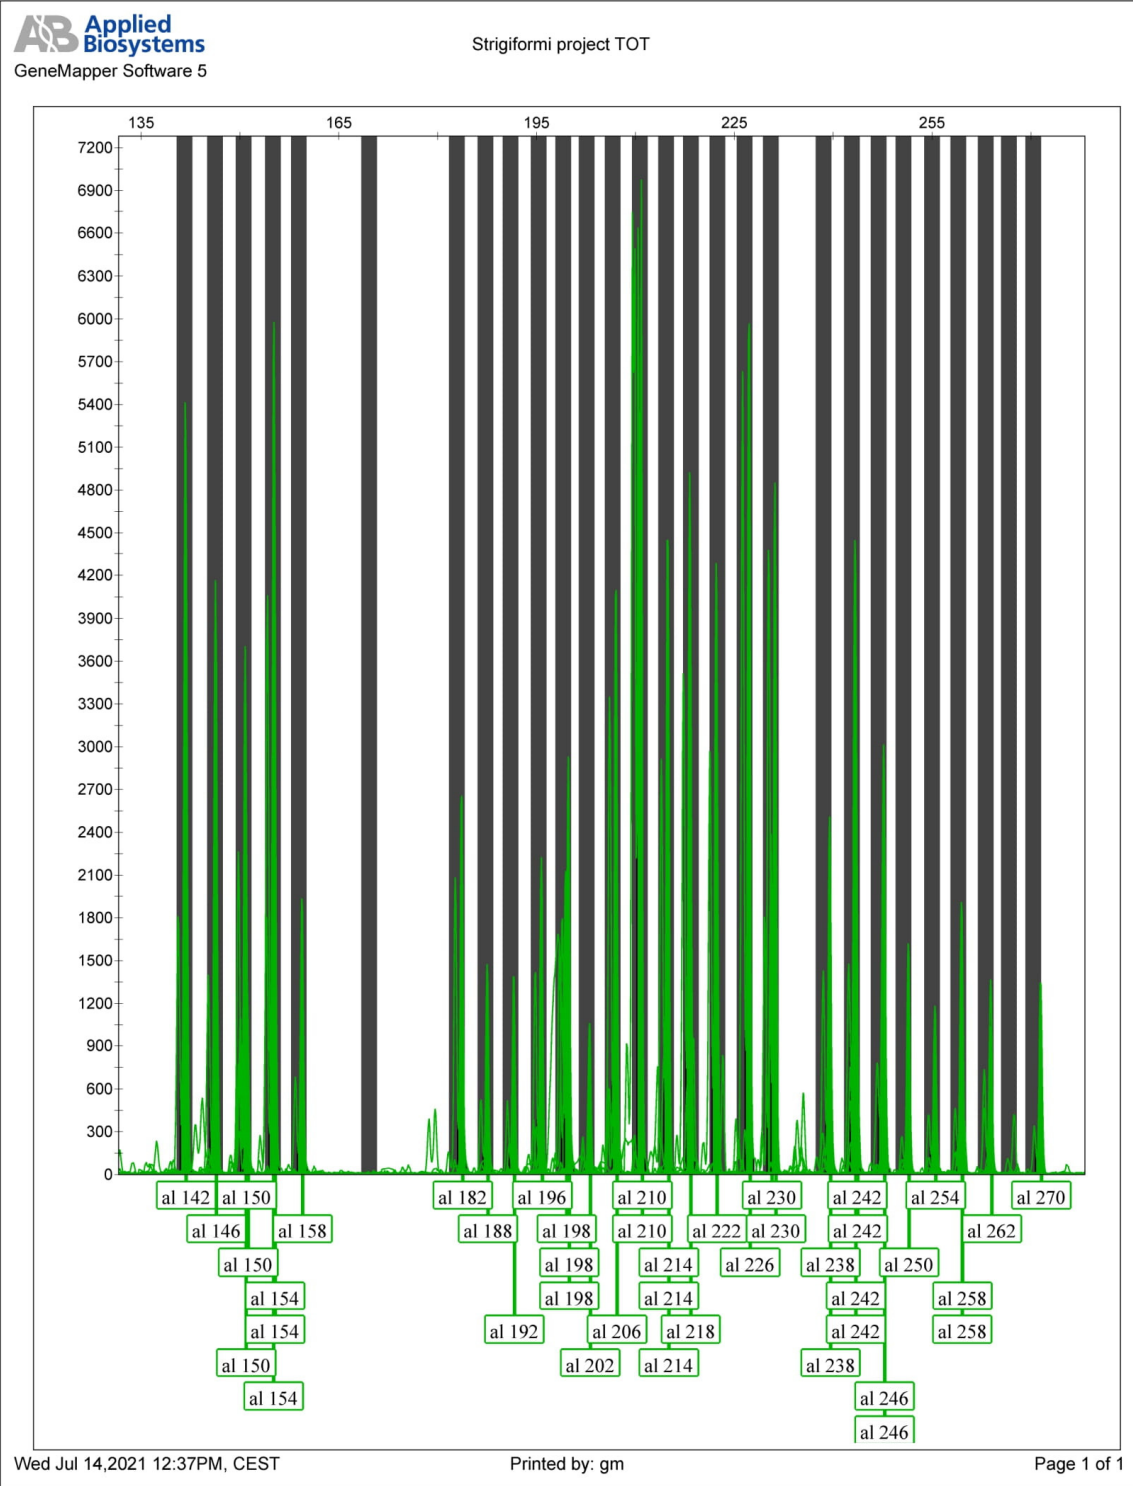

Supplement: s1 [file s1]
